# Supplementary material
Source: Springer Nature journal article supplement (https://www.springermedizin.de/resource/supplementary/12931_2013_1385_MOESM7_ESM.pdf/9426136)

TGCre+/-;PDGFR $\alpha$ F/FTGCre-/-;PDGFR $\alpha$ F/  
 TGCre+/-;PDGFR $\alpha$ F/FTGCre+/-;PDGFR $\alpha$ F/

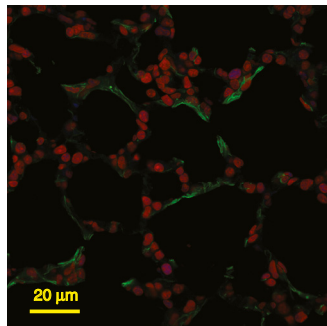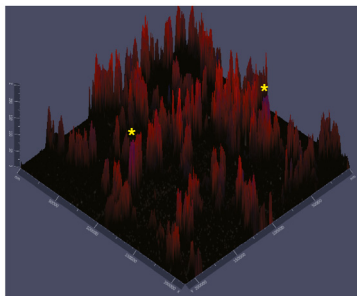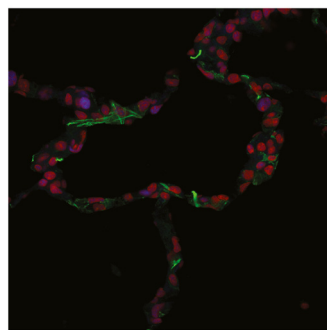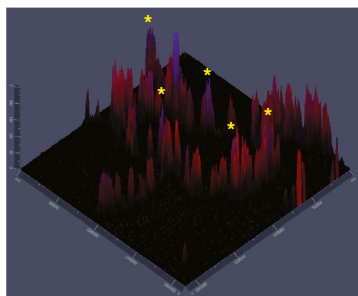

**A**

RGB

PoPo-3 (red), p27 (blue)

**B**

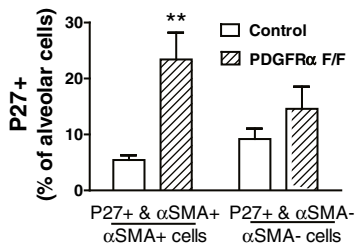

Supplement: MOESM7 [file 9426136]
